# Supplementary material for: An Ultrasensitive and Broadband Micro-Ring based Optomechanical Ultrasound Sensor for Photoacoustic Imaging
Source: Research Square preprint supplement (doi:10.21203/rs.3.rs-7670036/v1), 2025-11-13
Supplement: Supplementary file 1 [file 32bc69e4fb468e4500104bc8.docx]

**Supplementary Information**

**An Ultrasensitive and Broadband Micro-Ring based Optomechanical Ultrasound Sensor for Photoacoustic Imaging**

**Chao Xu1,2, Zijie Zhao3, Xu Chen4, Shuxiao Wang1*, Wei Wang4, Wencheng Yue1, Chenxi Wang1, Jian Shen1, Zhuoyun Li1,2, Hang Gao3*, and Yan Cai1,4***

1. State Key Laboratory of Materials for Integrated Circuits, Shanghai Institute of Microsystem and Information Technology, Chinese Academy of Sciences, Shanghai 200050, China

2. University of Chinese Academy of Sciences, Beijing 100049, China

3. Institute of Microelectronics of the Chinese Academy of Sciences, Beijing 100029, China

4. Shanghai Industrial μTechnology Research Institute, Shanghai 201800, China

* Correspondence: Shuxiao Wang (wangsx@mail.sim.ac.cn)

State Key Laboratory of Materials for Integrated Circuits

Shanghai Institute of Microsystem and Information Technology

Chinese Academy of Sciences

Shanghai 200050, China

Email: wangsx@mail.sim.ac.cn

Phone: +86 15953421681

* Correspondence: Hang Gao (gaohang@ime.ac.cn)

Institute of Microelectronics of the Chinese Academy of Sciences

Beijing 100029, China

Email: gaohang@ime.ac.cn

Phone: +86 010-82995813

* Correspondence: Yan Cai (yan.cai@mail.sim.ac.cn)

State Key Laboratory of Materials for Integrated Circuits

Shanghai Institute of Microsystem and Information Technology

Chinese Academy of Sciences

Shanghai 200050, China

Email: yan.cai@mail.sim.ac.cn

Phone: +86 15506249913

Supplementary Note S1: Hydrophone calibration


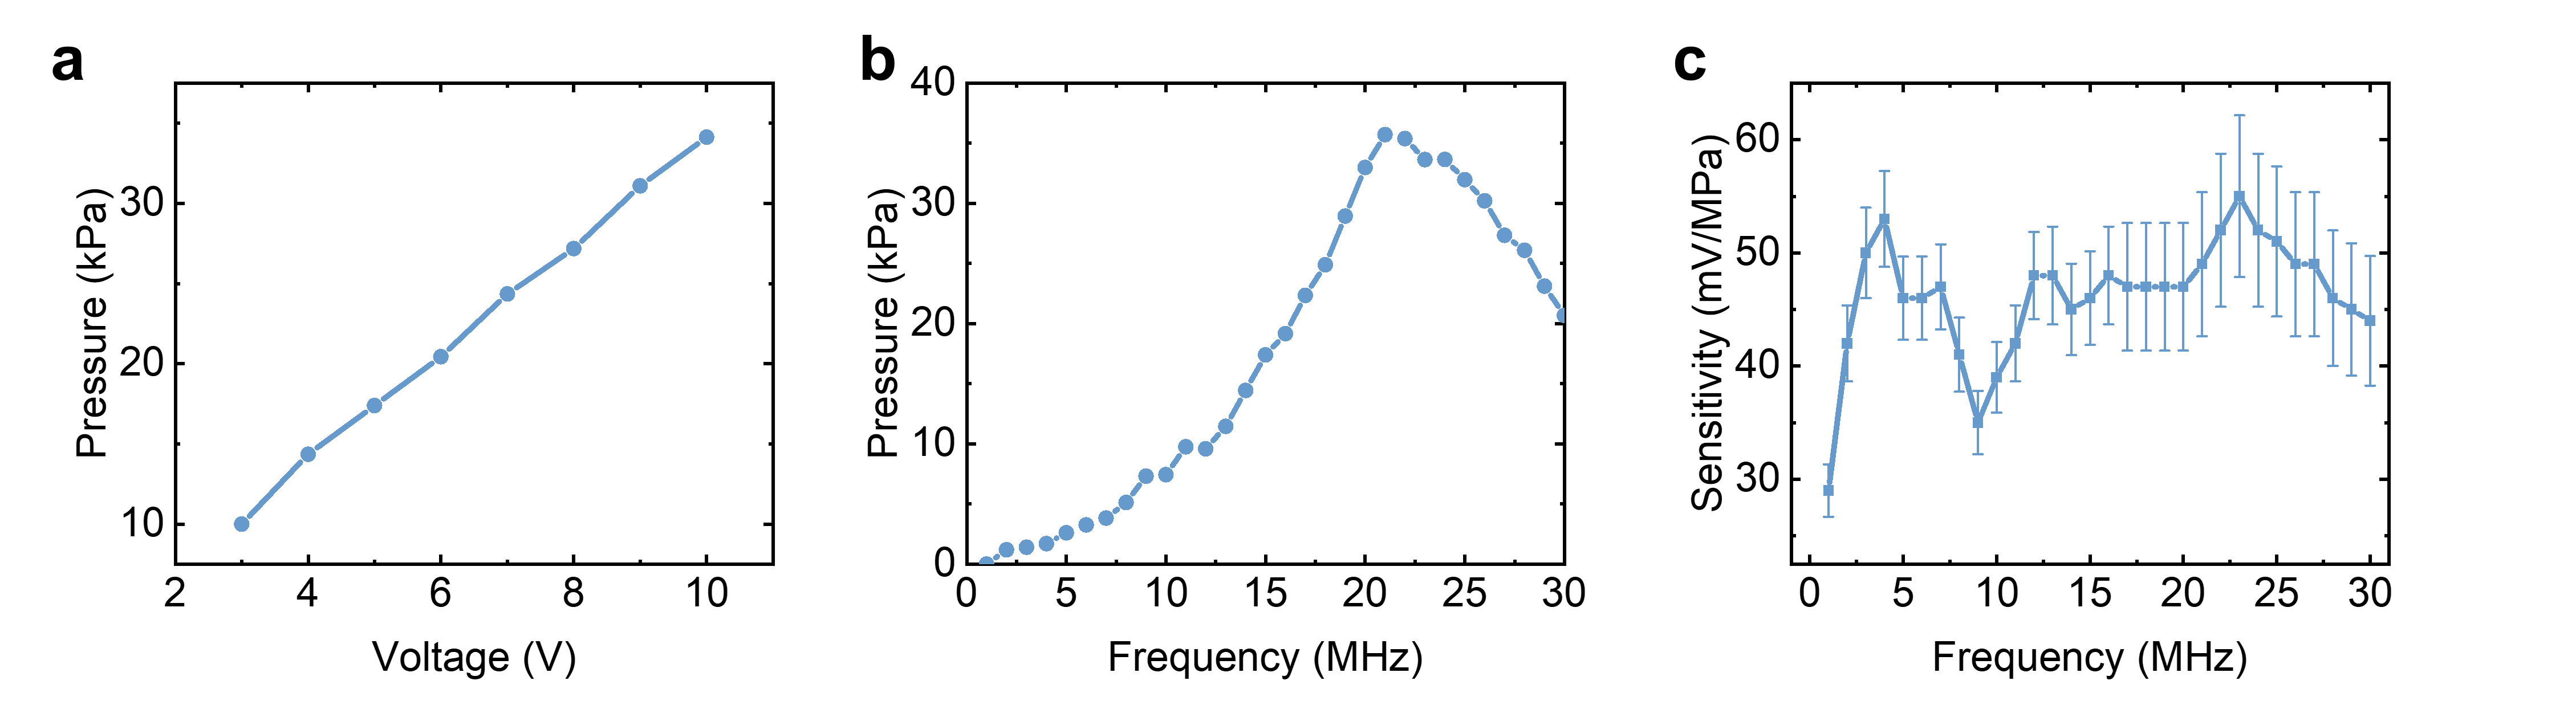


**Fig. S1. Hydrophone calibration data.** (**a**) Measured acoustic pressure versus excitation voltage at 20 MHz operating frequency, exhibiting linear response characteristics. (**b**) Frequency-dependent acoustic pressure response under 10 Vpp excitation. (**c**) Needle hydrophone calibration data. Acquired from Precision Acoustics Ltd (Dorchester, UK), sensor diameter 0.2 mm.

We first validated the hydrophone linear response: **Fig. S1**a demonstrates its output signal under 20 MHz excitation across varying drive voltages, exhibiting excellent linearity within the tested range. This ensures subsequent sensor evaluations operate within the linear regime. A piezoelectric ultrasound transducer with a 20 MHz center frequency was then driven at Vpp = 10 V, with its spectral output shown in **Fig. S1**b.

**Fig. S1**c presents the calibration results of a 0.2 mm needle hydrophone from Precision Acoustics (Dorchester, UK), showing sensitivity variations (1-30 MHz) and frequency-dependent uncertainty.

The calibration certificate of the hydrophone was issued on July 19, 2024 and our experiments with this hydrophone were performed on December 6, 2024. Calibration is traceable to recognised national standards and to units of measurement realised at the National Physical Laboratory or other recognised national standards laboratories. Precision Acoustics Ltd is certified to the ISO 9001 standard. The average sensitivity across 1-30 MHz was 56.7 mV/MPa.

Supplementary Note S2: Micro-ring optomechanical ultrasound sensor modelling and design

Optical power couples from the straight waveguide into the micro-ring resonator, where the transmitted power *T* depends on both the wavelength *λ* and membrane deflection induced by acoustic pressure *p*. The deflection alters the effective refractive index *neff*, shifting the micro-ring resonance peak. By tuning the wavelength to the flank of the resonance curve, the optical intensity at a fixed wavelength changed as the incident acoustic pressure, which is subsequently detected by a photodetector. In the sensor design, we optimized the waveguide and membrane geometry to maximize snesor sensitivity. Key parameters include: membrane thickness *tM*, membrane radius *RM*, silicon waveguide width *wSi*, height *hSi*, SiN slab thickness *tSiN*, gap height *g*, micro-ring radius *Rring*, and directional coupler gap *gdc*. The micro-ring and membrane share a common center. A combined approach of numerical simulations and analytical modeling was employed for sensitivity optimization. The membrane vibrational response under acoustic pressure *p* at frequency *f* was simulated using finite element method (FEM), while waveguide properties and *neff* were calculated using an electromagnetic mode solver. The sensitivity *S* of the micro-ring ultrasound sensor can be expressed as:

Here, *wr* is the displacement of the membrane at the position of the micro-ring resonator, *w0* is the displacement of the membrane at the position of center. As the change of the displacement of the membrane at the position of the micro-ring resonator is equal to the change of the gap, *∂g/∂wr* = 1.

The design optimization commenced with the SiO₂ membrane, where we balanced the acoustomechanical resonance frequency *fM* and vibration amplitude *w0* by tuning its radius *RM* and thickness *tM*. Single-variable analysis revealed that larger, thinner membranes exhibit greater center displacement *w0* and lower *fM* (**Fig. S**2c-d). To achieve optimal ultrasound detection performance and imaging resolution, we finalized a membrane design with a center frequency of 38 MHz, setting *tM* = 2 μm (to suppress optical leakage) and *RM* = 9 μm. The simulated acoustomechanical sensitivity spectrum exhibits a -6 dB bandwidth of 33 MHz with a fractional bandwidth of 87%.


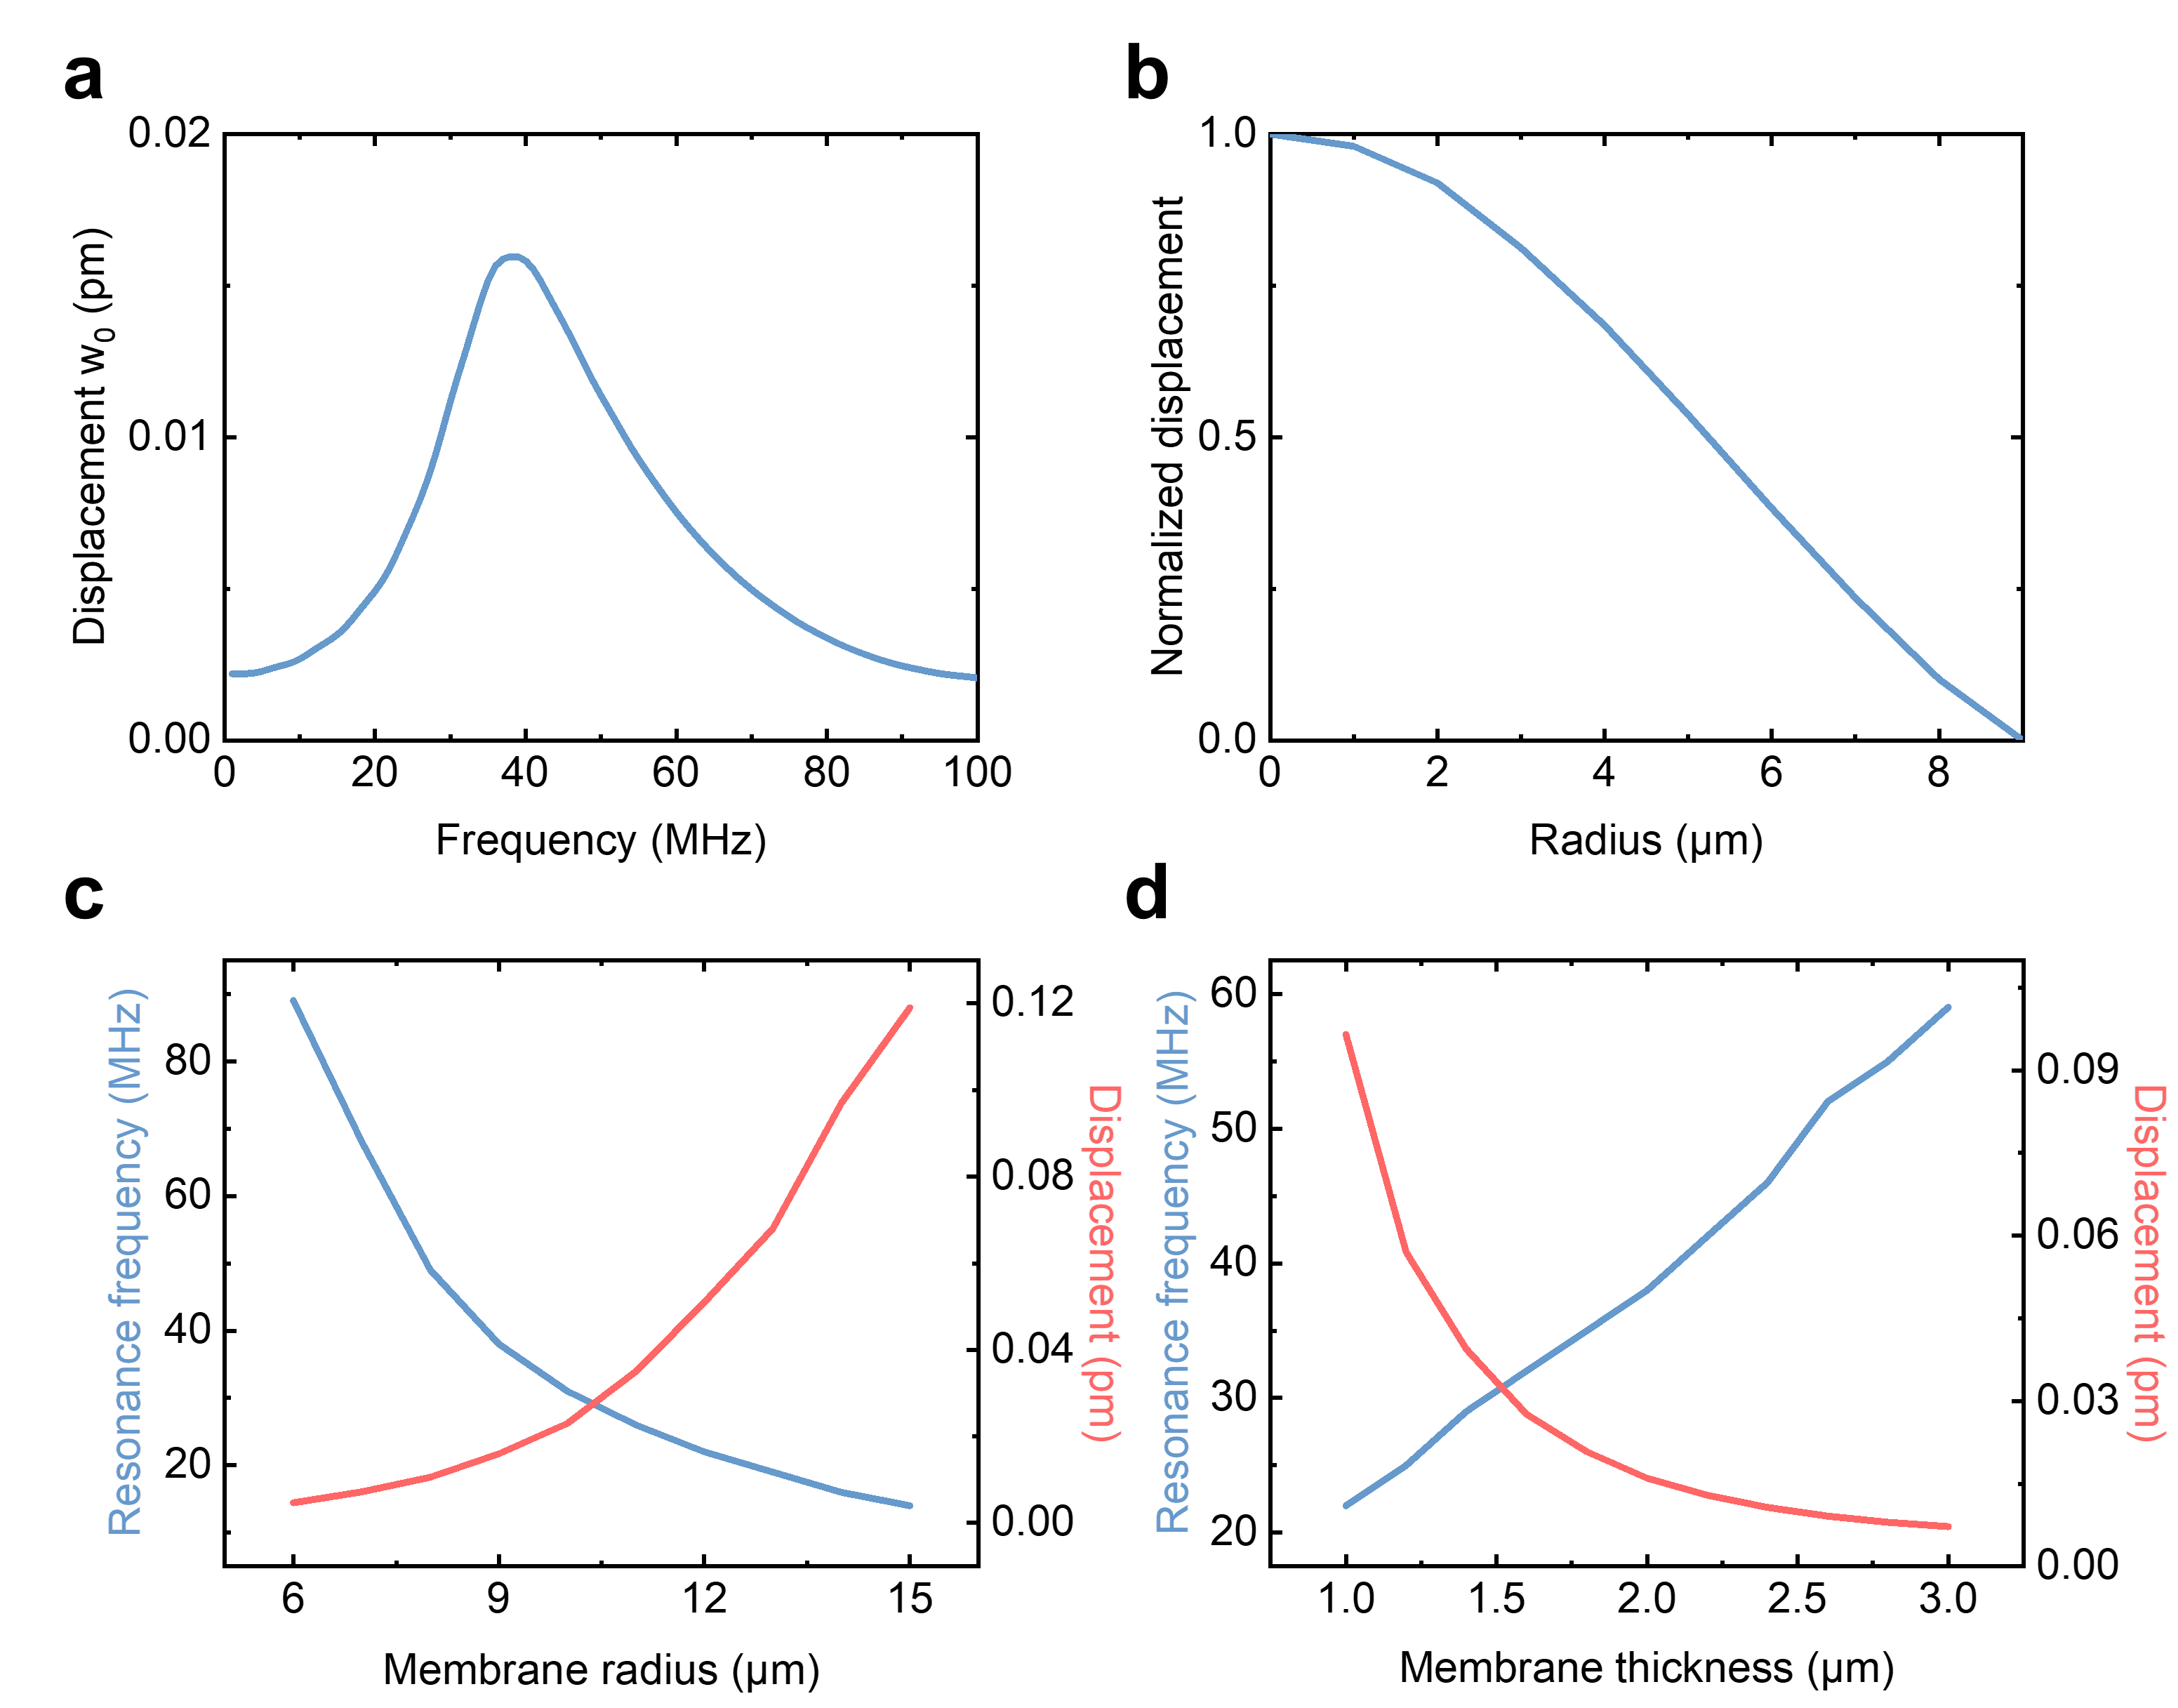


**Fig. S2. Membrane design.** (**a**) Simulated acoustomechanical sensitivity spectrum of a membrane with 9 μm radius and 2 μm thickness under 1 Pa incident plane-wave acoustic excitation, showing the frequency-dependent displacement *w0* at the membrane center. (**b**) Normalized displacement *wr*/*w0* for the membrane. (**c**) Resonance frequency (left axis) and central displacement (right axis) as functions of membrane radius. (**d**) Resonance frequency (left axis) and central displacement (right axis) as functions of membrane thickness.

Next, we designed the micro-ring and waveguide parameters. The photonic response of the all-pass micro-ring resonator was modeled analytically. For an all-pass micro-ring configuration, the output waveguide power transmission *T* is expressed as:

where *α* is the round-trip amplitude loss, *τ* is the coupling coefficient, and the phase delay is:

The sensitivity:

The ratio *∂T*/*∂neff* is predominantly depend on the waveguide propagation loss, where lower loss results in higher sensitivity 1.

For waveguide parameter optimization, the effective refractive index *neff* was calculated using the finite-difference method. The sensitivity *∂neff*/*∂g* increases with reduced gap height *g* (**Fig. 2**c, main article). Enabled by advanced CMOS-compatible fabrication, we achieved a minimal gap of *g* = 30 nm, adopted as the optimal design. We simulated the sensor sensitivity *∂neff*/*∂g* through a systematic parametric analysis of Si waveguide width *wSi*, Si waveguide thickness *tSi*, and SiN slab thickness *tSiN* (**Fig. S3**a).

In addition, bending radiation loss was simulated as a function of micro-ring radius *Rring*, with a threshold of 0.01 dB/cm (significantly below experimental propagation loss). This defined the minimum allowable radius *Rring, min* for each waveguide geometry (**Fig. S3**b). Larger Si waveguide thickness *tSi* and thinner SiN thickness *tSiN* reduced bending loss. We compute *∂neff*/*∂g* (**Fig. S3**a) times *wr*/*w0* (**Fig. S2**b) when ring radius at the minimal waveguide bend radius *Rring, min* (**Fig. S3**b), to arrive at *∂neff*/*∂w0* (**Fig. S3**c).


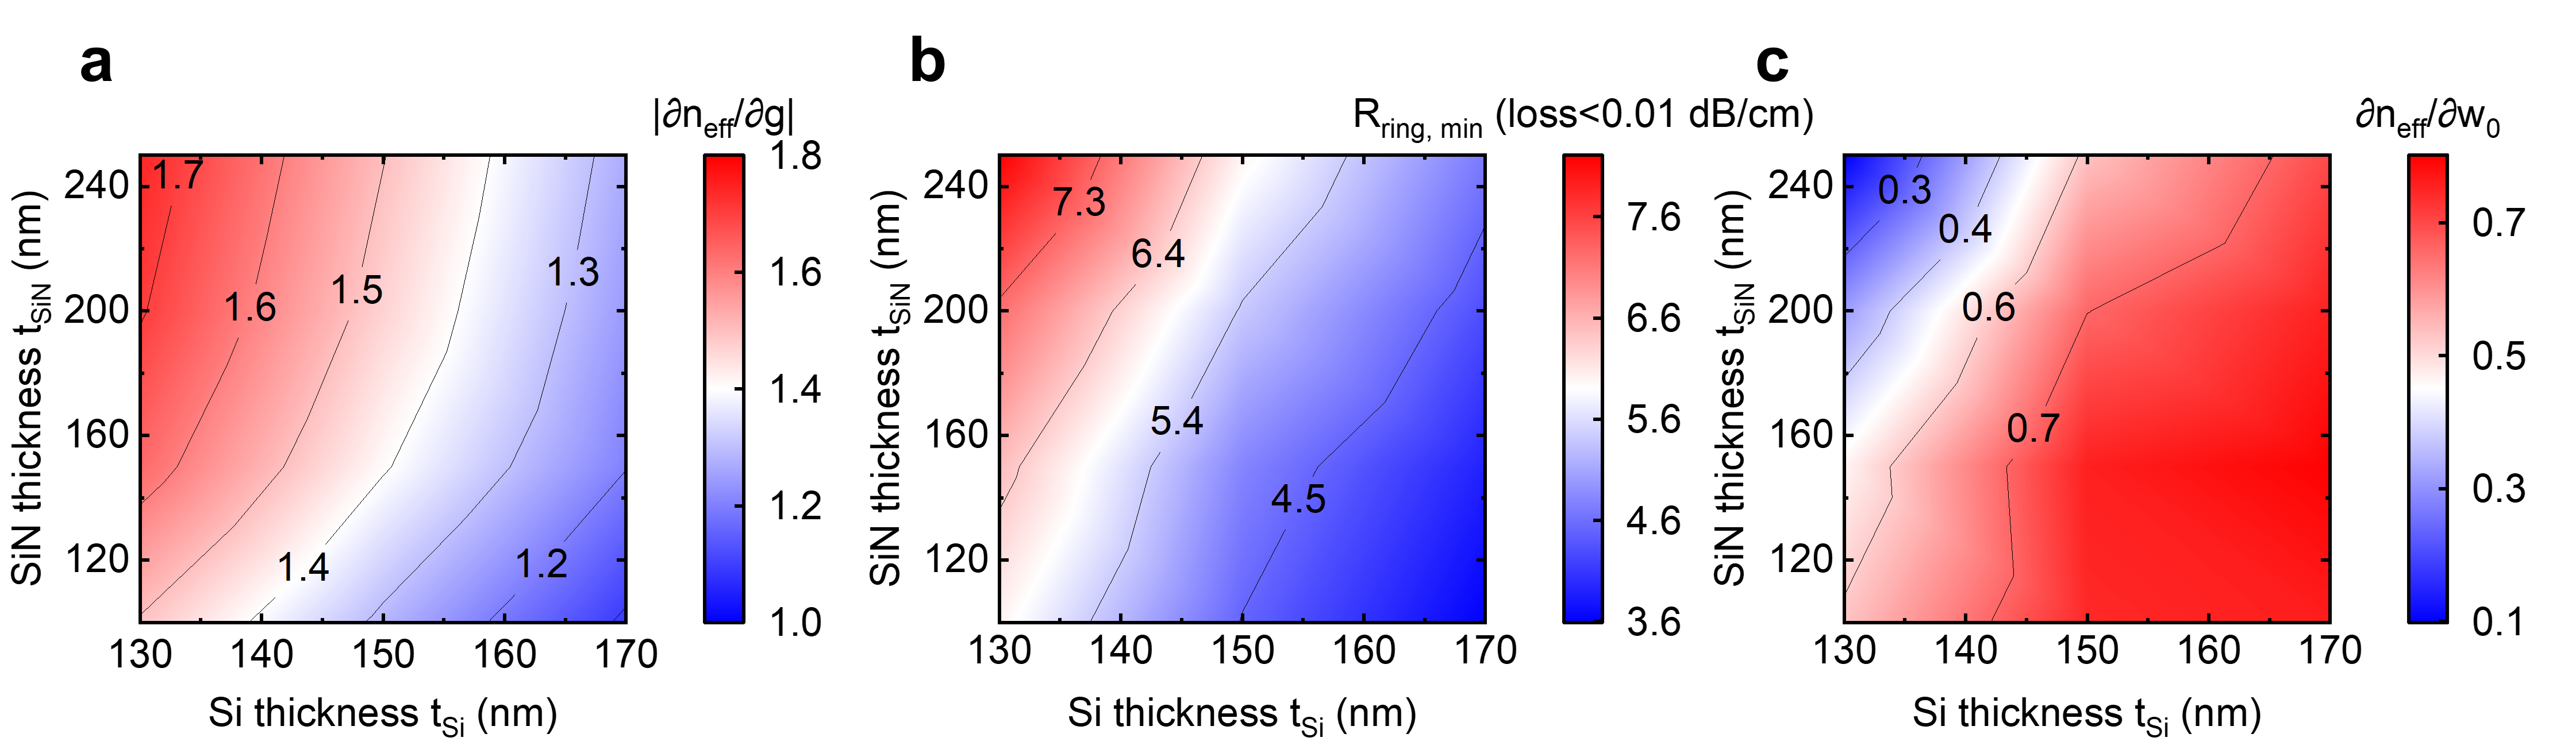


**Fig. S3. Waveguide design.** (**a**) Simulated sensitivity of waveguide effective refractive index *neff* as a function of gap height *g*. (**b**) Simulated minimal bending radius *Rring, min* required for radiation loss < 0.01 dB/cm. (**c**) Simulated optomechanical sensitivity, the dependence of the waveguide effective refractive index *neff* on membrane center displacement *w0*.

Considering waveguide single-mode transmission, this design optimum has Si waveguide width 550 nm, Si waveguide thickness 150 nm, SiN slab thickness 150 nm, ring radius 5.5 µm. This design achieves a sensitivity *∂T*/*∂p* = 0.3 kPa-1, using *∂w0*/*∂p* = 16.6 fm/Pa, *∂neff*/*∂w0* = 0.8 μm-1 from **Fig. S3**c, and *∂T*/*∂neff* = 2.3×104 at waveguide loss of 6 dB/cm.

The transmission spectra of the designed micro-ring resonators were calculated using **Eq. (2)** and plotted in **Fig. S4**a. Furthermore, a 1D array composed of ten micro-ring resonators with slightly different radius is designed, and its simulated spectral response is presented in **Fig. S4**b.


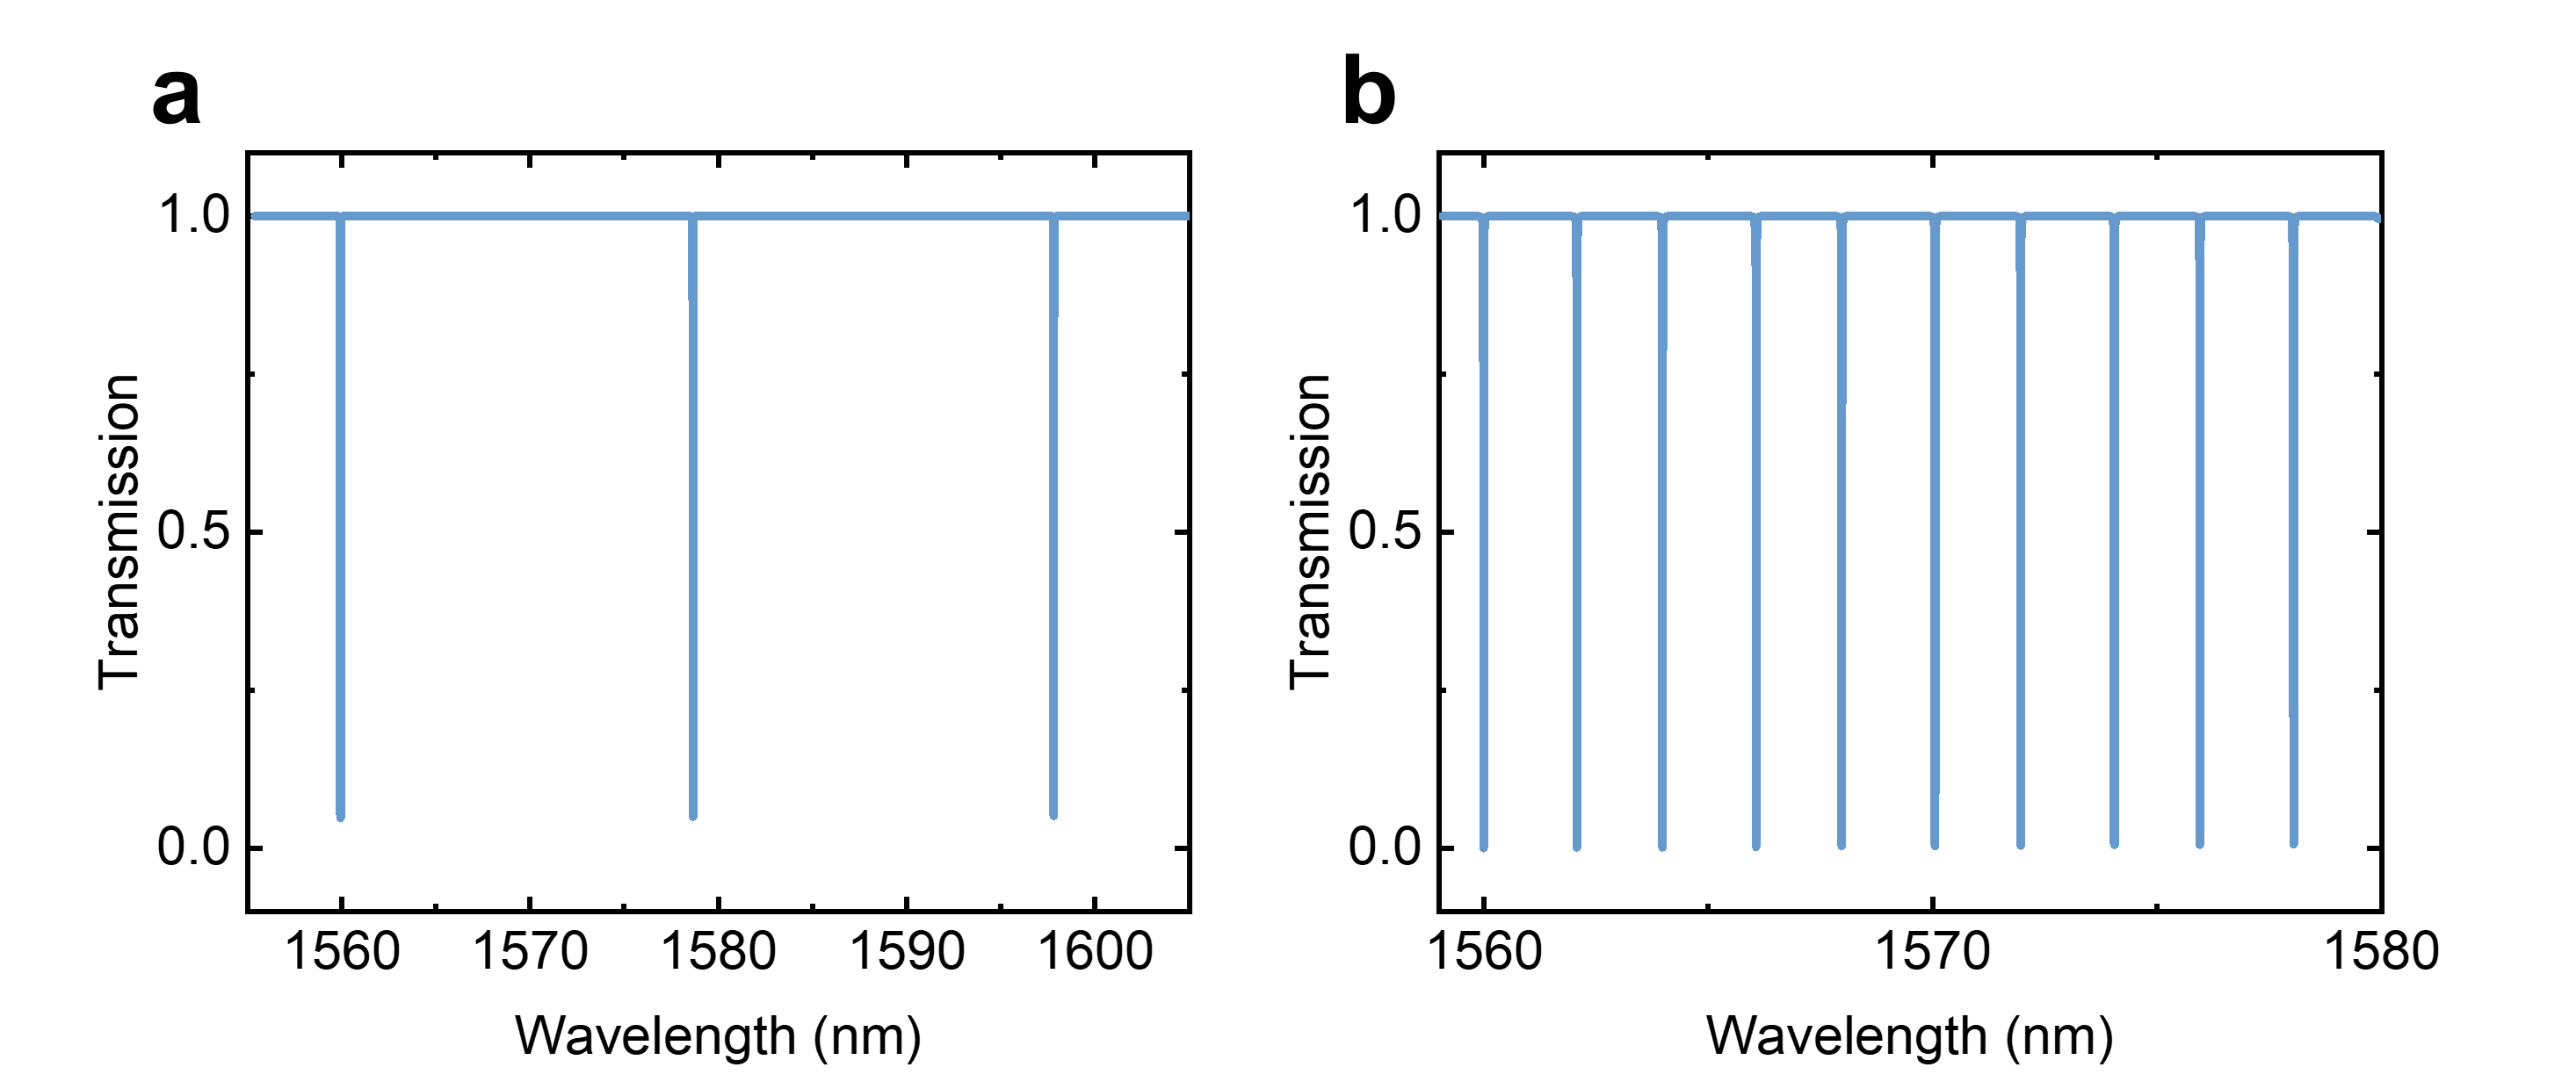


**Fig. S4. Simulated transmission spectrum.** (**a**) Simulated transmission *T* as function of wavelength *λ* for the designed micro-ring resonator. (**b**) Simulated transmission spectrum of micro-ring array.

Supplementary Note S3: Driving voltage and optical power effects on photonic device sensitivity


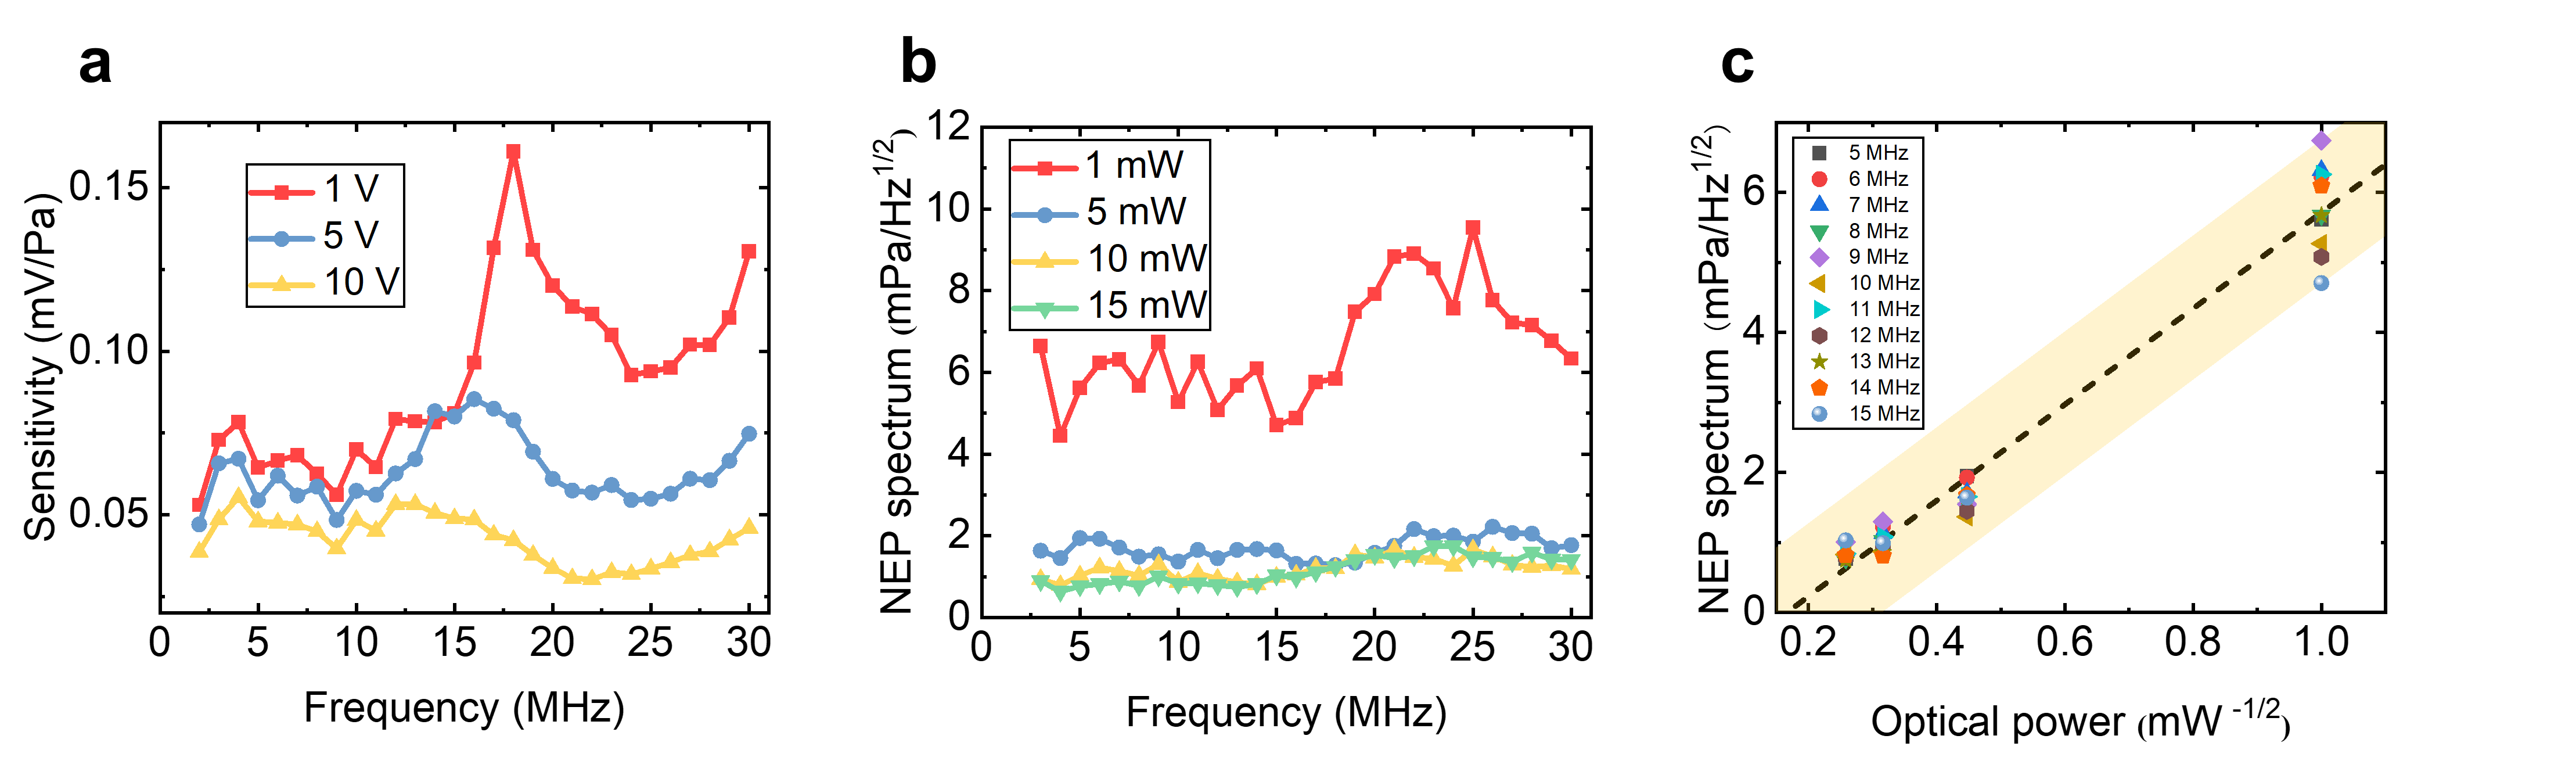


**Fig. S5. Driving voltage and optical power effects on photonic device sensitivity.** (**a**) Sensitivity spectral of the sensor under 1 V (red curve), 5 V (blue curve), and 10 V (yellow curve) excitation voltages, at incident optical powers of 10 mW. (**b**) NEP spectral density at incident optical powers of 1 mW (red curve), 5 mW (blue curve), 10 mW (yellow curve), and 15 mW (green curve), at excitation voltage of 10 V. (**c**) NEP spectral density (5-15 MHz) as a function of (optical power) −0.5.

**Fig. S5**a illustrates the sensitivity frequency response of the sensor under varying drive voltages. As the drive voltage increases, the received acoustic pressure level rises and eventually saturates (**Fig. 4**c, main article), which leads to a corresponding decrease in sensor sensitivity. The spectral line variation above 15 MHz in **Fig. S5**c is attributed to this same mechanism.

In cavity optomechanical sensors, the main sources of noise include thermal noise, which is related to the environment temperature, and detection noise from the probe laser 2. The displacement noise power spectral density (PSD) of thermal noise is expressed as:

Here, represents the mechanical susceptibility, quantifying the displacement of the mechanical resonator in response to an external force in the frequency domain, for a simple case of a single mechanical resonance with an angular frequency of *ωm*. The parameters m and *γ* represent the effective mass and damping rate of the mechanical resonator, respectively.

One of the detection noise is the shot noise. The displacement PSD of the shot noise is expressed as:

In this equation, is the intracavity photon number, where *P* is the incident optical power and *ωL* is optical resonance frequency. is the optical power decay rate, and *η* stands for the optical detection efficiency. represents the optomechanical coupling coefficient, quantifying the optical resonance frequency shift for a mechanical displacement *x*.

The NEP can be obtained from the noise PSD, which is calculated using the following equation:

Here, *r* represents the ratio of the pressure difference between the upper and lower surfaces of the sensor to the peak pressure at the antinode of the incident ultrasound wave, *ζ* is the spatial overlap between the incident ultrasound and the mechanical displacement profile of the sensor, *A* is the sensor area.

Incident optical power has no effect on the thermal noise term, while does effect the shot noise. The shot noise remains constant within the frequency range and dominate when it is far from the mechanical resonance. The NEP scales inversely with the square root of the incident optical power. As shown in **Fig. S5**c, the experimental results demonstrate strong consistency with the theoretical prediction.

Supplementary Note S4: Photoacoustic signals at various detection distances


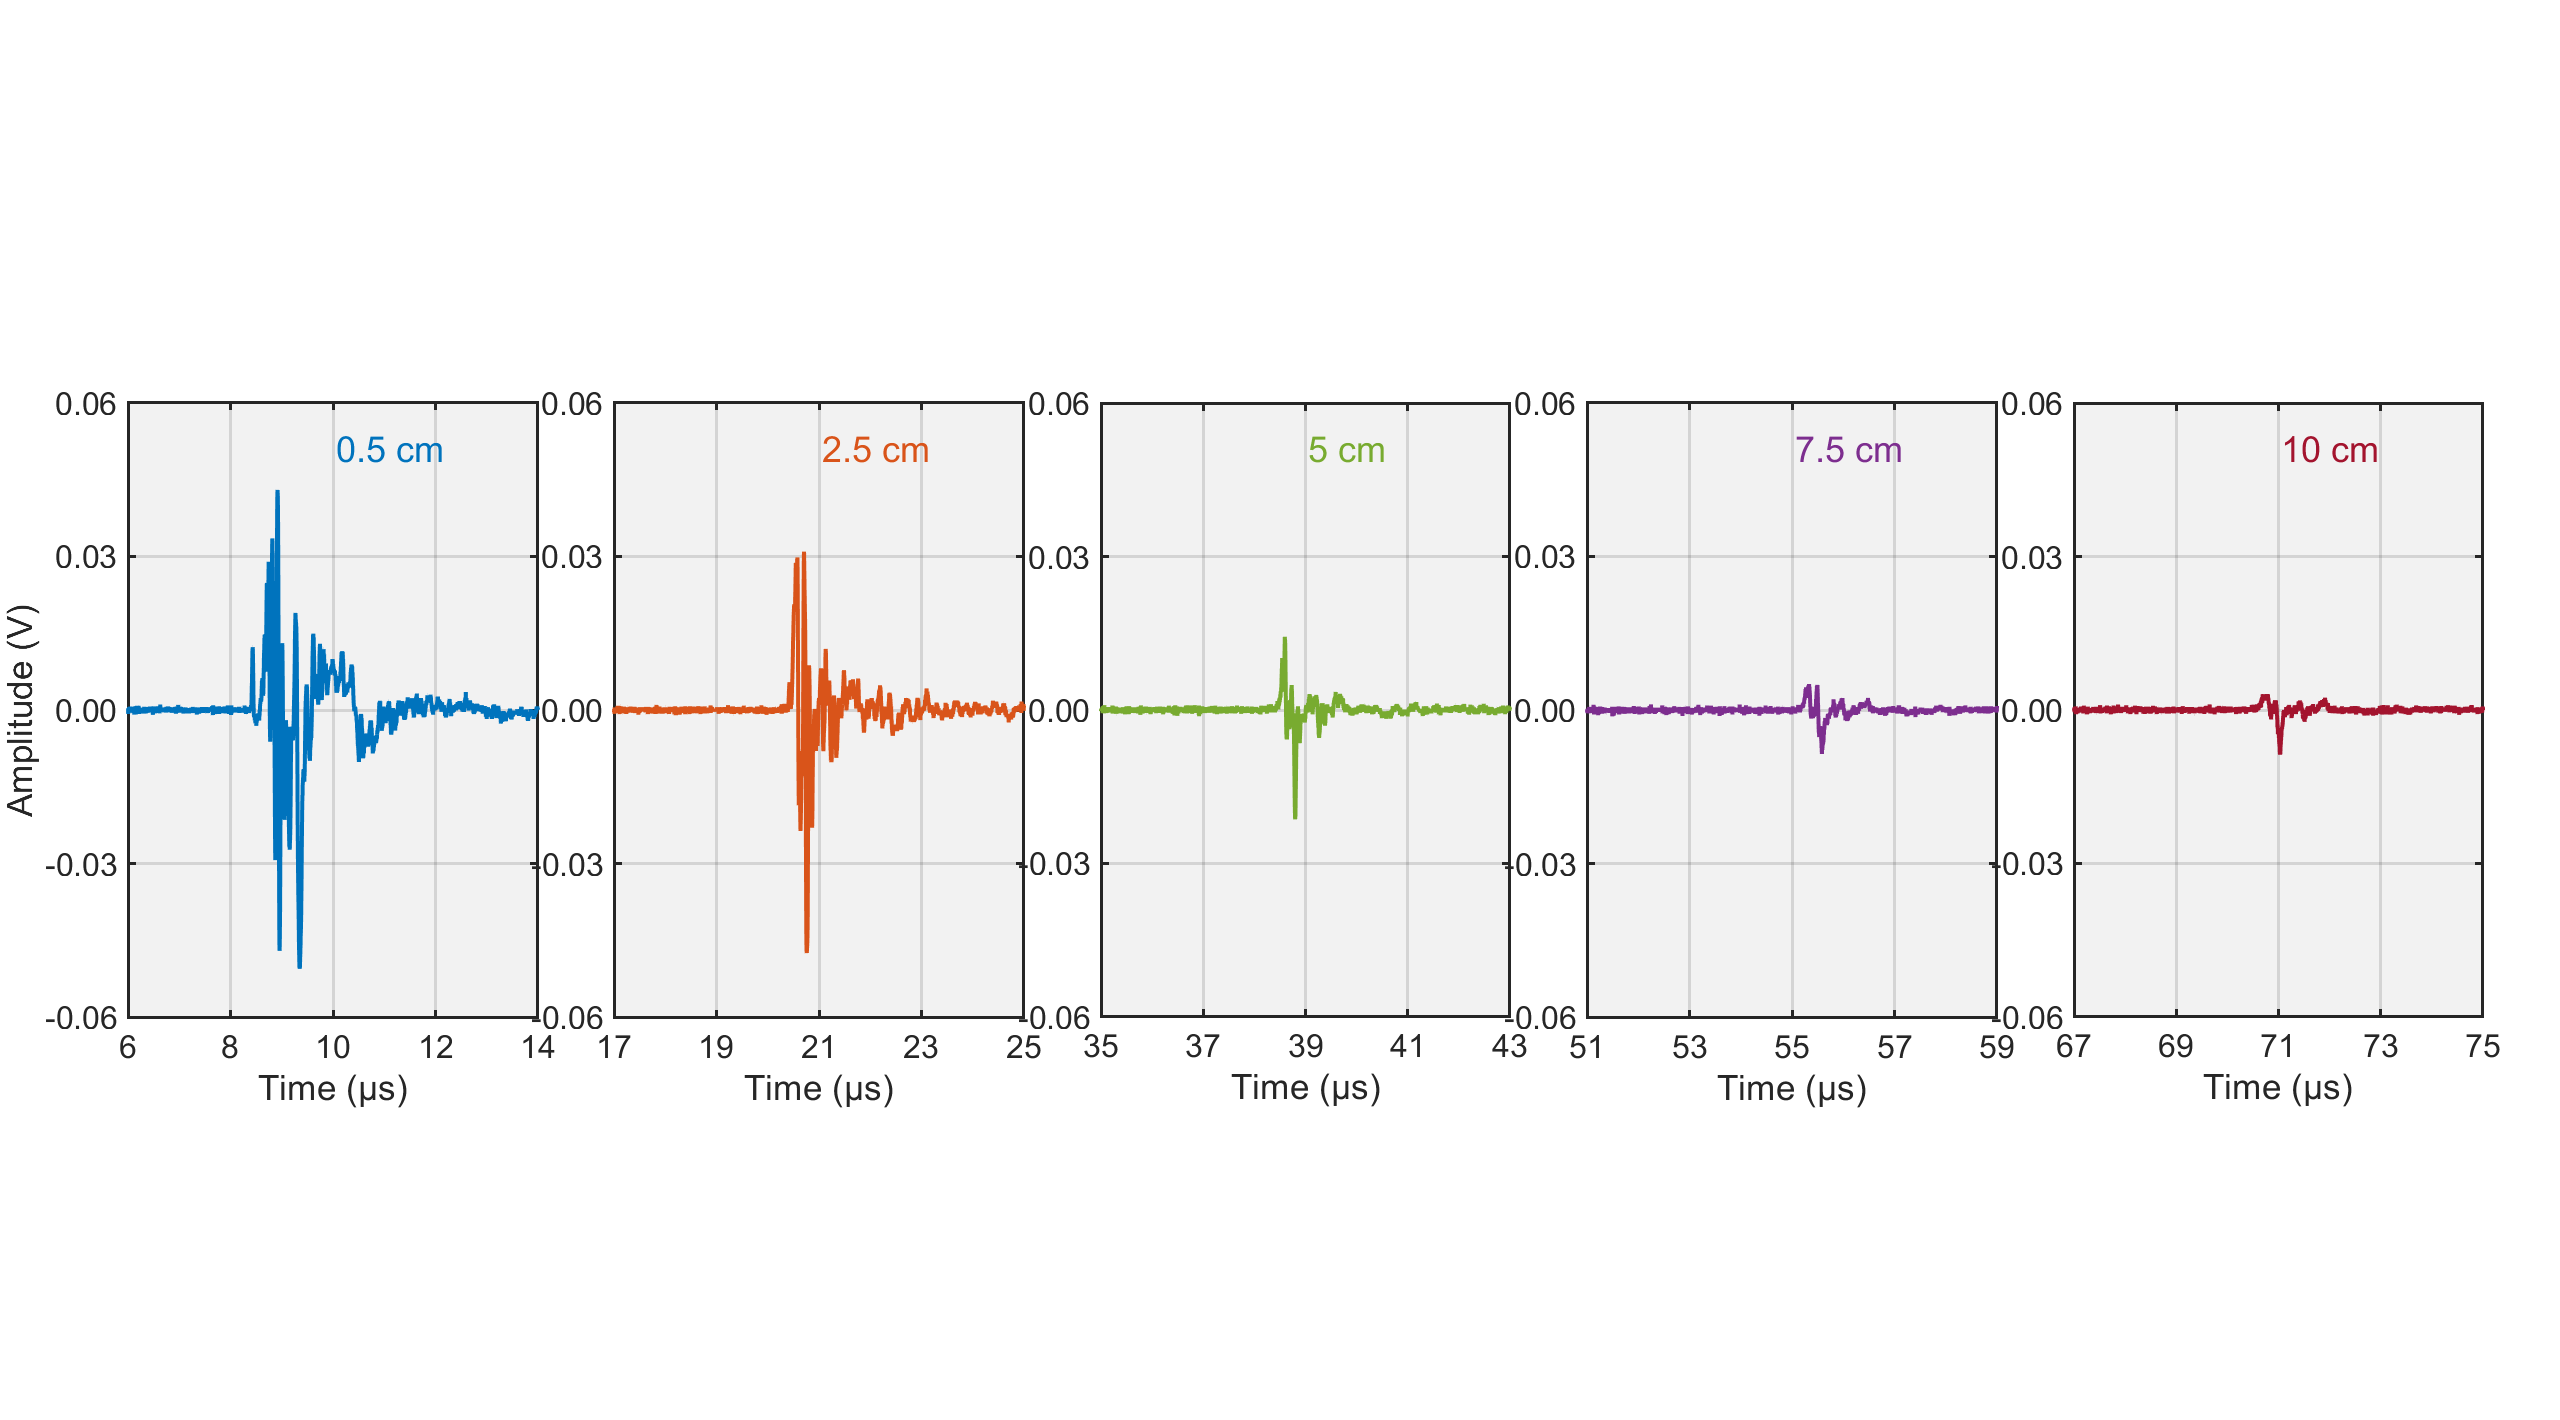


**Fig. S6. Photoacoustic signals received by the micro-ring sensor at various detection distances.**

Photoacoustic signals were generated by focusing 532 nm pulsed laser light onto black tape immersed in a water tank. The distance between the sensor and the photoacoustic source was controlled using a 3D translation stage to simulate the detection depth of the sensor in biological tissue. Photoacoustic signals were recorded at positions ranging from 0.5 cm to 10 cm (**Fig. S6**), demonstrating a signal-to-noise ratio (SNR) of 18 dB even at a distance of 10 cm.

Supplementary Note S5: Measurement setup and time-domain signals of individual elements in the micro-ring ultrasound sensor array


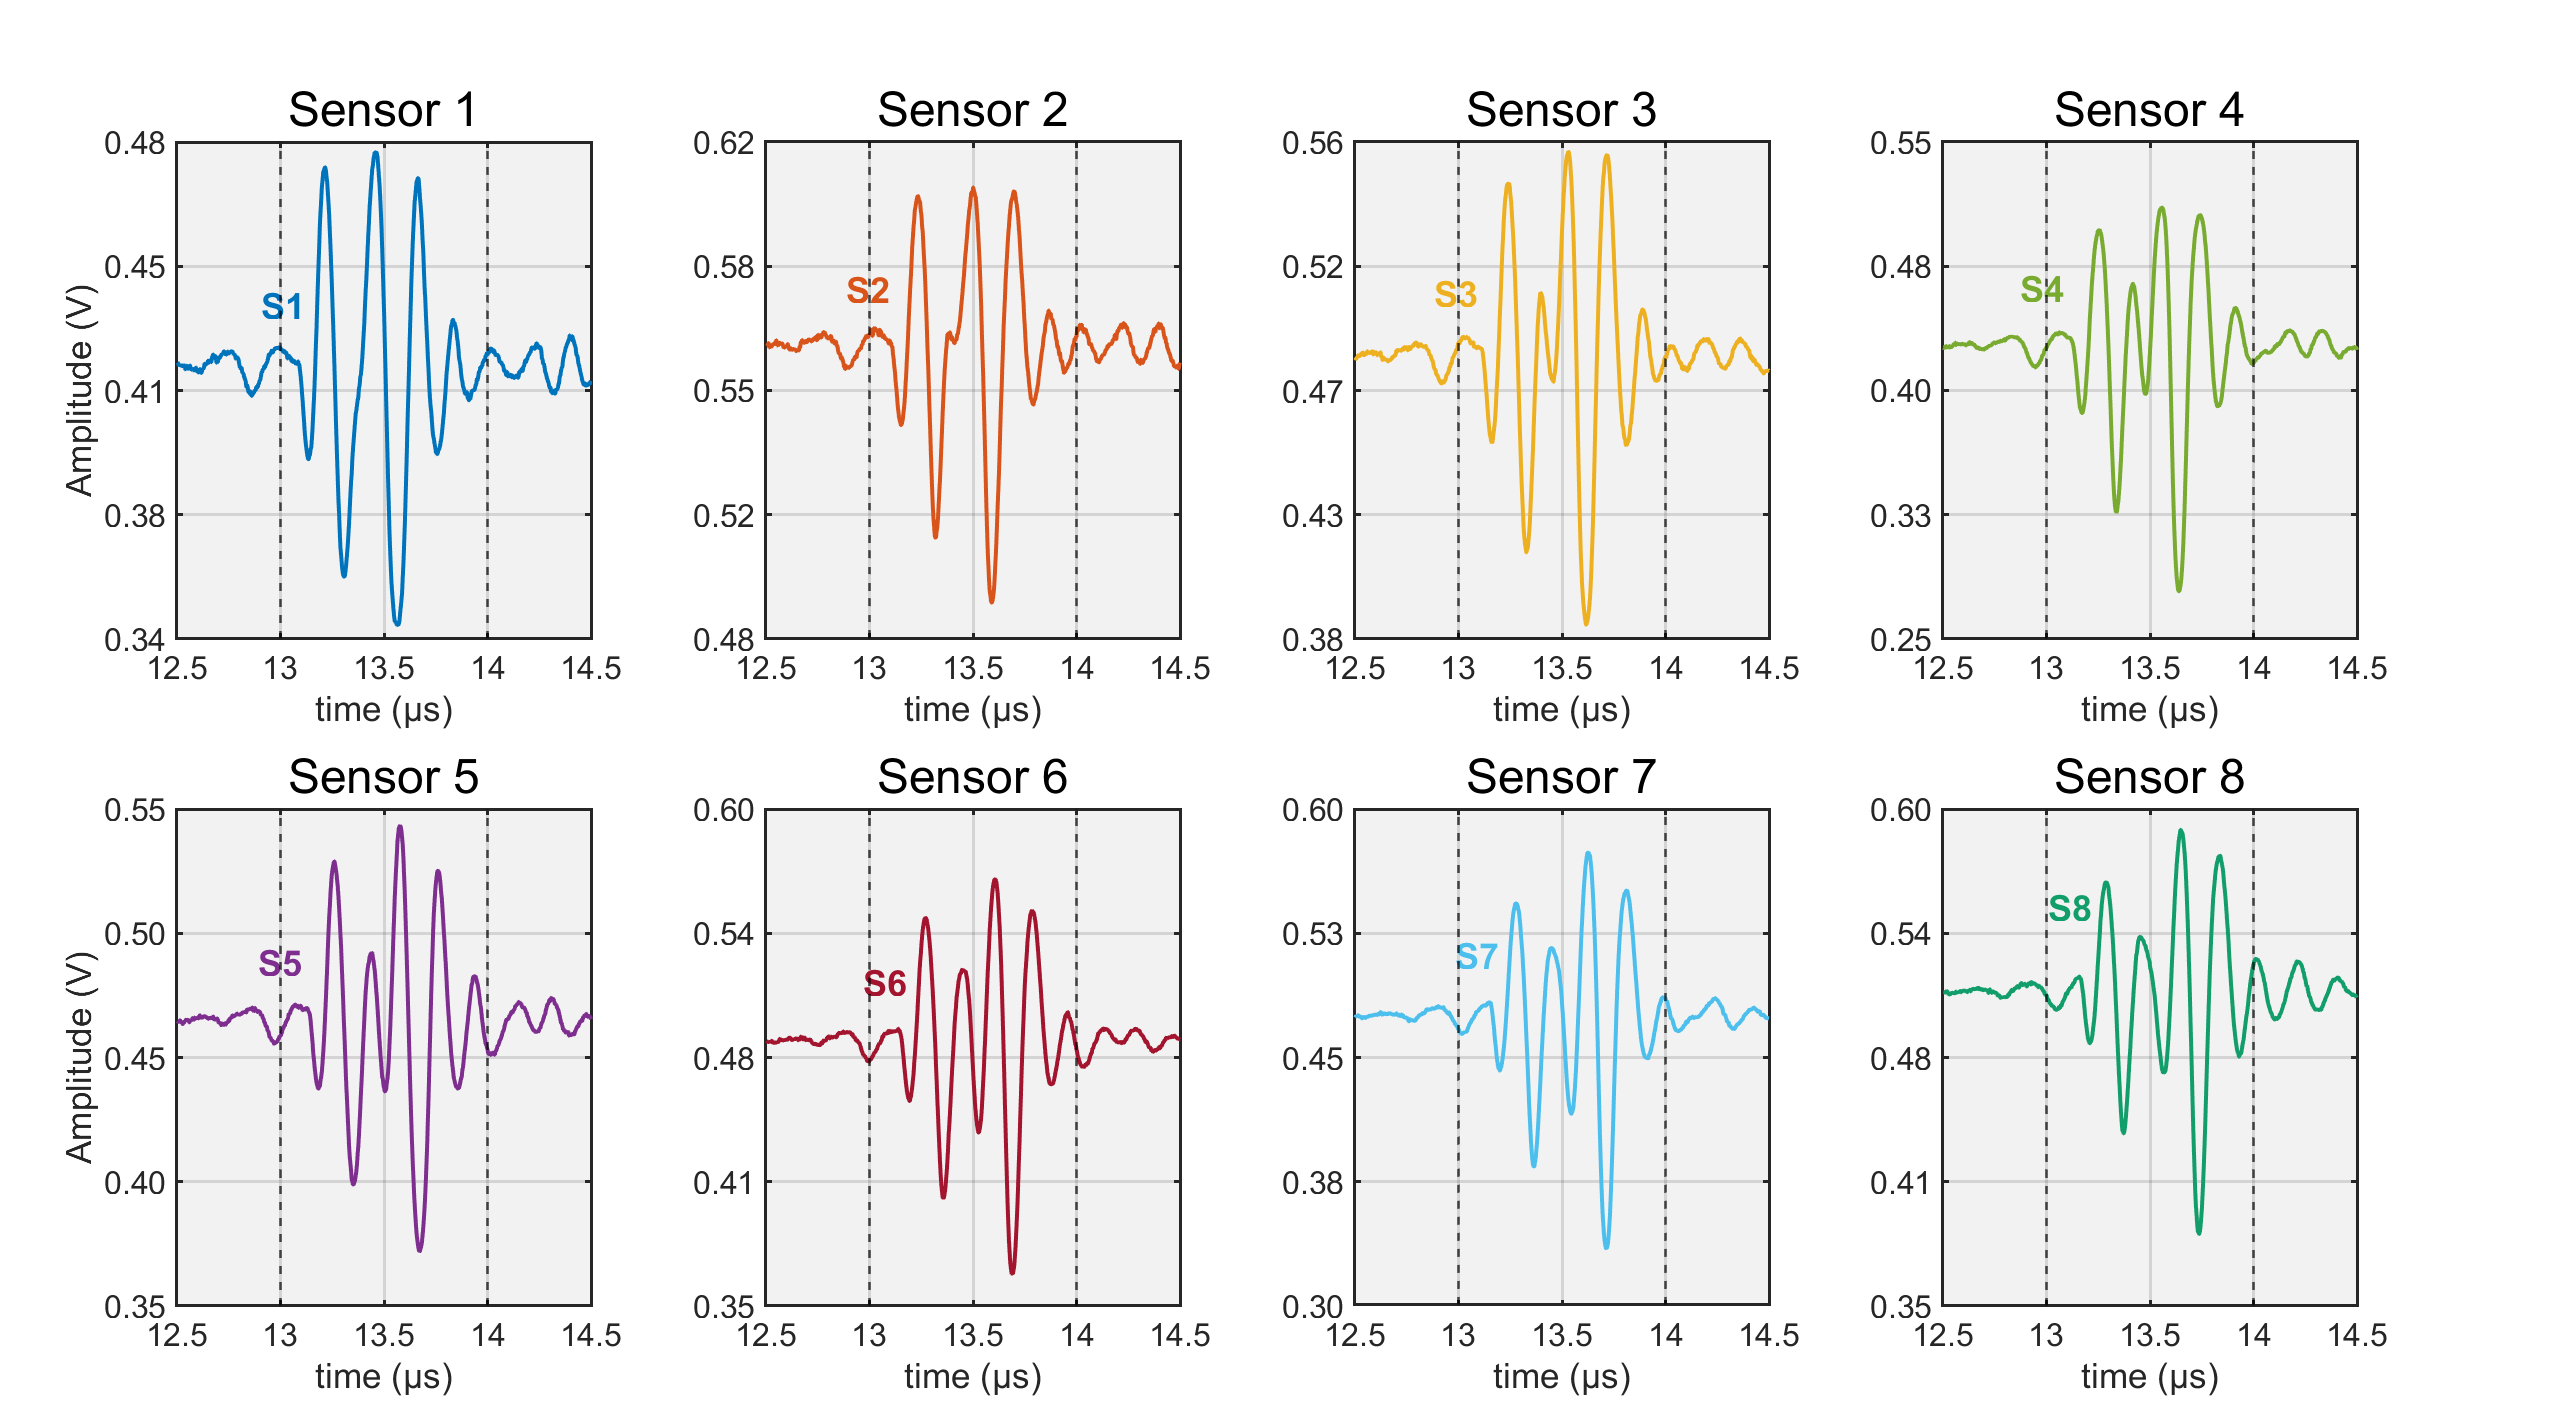


**Fig. S7. Time-domain signals from each element of the micro-ring sensor array.**

A short ultrasound pulse (f = 5 MHz, 1 cycle count, 1 ms burst period) was generated by driving a piezoelectric transducer (V310-SU, center frequency 5 MHz, element size 0.25 inch; Olympus) with an arbitrary waveform generator (33600A waveform generator, 100MHz; Keysight Technologies). The sensor was tilted to allow the ultrasound wave to incident on the chip at a 20° angle. By tuning the laser wavelength to the resonance of each sensor within one free spectral range (FSR), independent ultrasound reception was achieved for each sensing element. **Fig. S7** shows the time-domain signals of eight elements in the one-dimensional ultrasound sensor array, captured between 12.5 μs and 14.5 μs, demonstrating that an element spacing of 40 μm enables individual operation of each sensor.

**References:**

1. Westerveld, W. J. et al. Sensitive, small, broadband and scalable optomechanical ultrasound sensor in silicon photonics. *Nature Photonics* **15**, 341-345 (2021).

2. Cao, X., Yang, H., Wu, Z.-L. and Li, B.-B. Ultrasound sensing with optical microcavities. *Light: Science & Applications* **13**, 159 (2024).
